# Supplementary material for: Comparison of Long-term Survival of Patients With Early-Stage Non–Small Cell Lung Cancer After Surgery vs Stereotactic Body Radiotherapy
Source: PubMed Central journal article supplement (PMC6902813; doi:10.1001/jamanetworkopen.2019.15724), 2019-11-20

## Supplementary Online Content

Chi A, Fang W, Sun Y, Wen S. Comparison of long-term survival of patients with early-stage non–small cell lung cancer after surgery vs stereotactic body radiotherapy. *JAMA Netw Open*. 2019;2(11):e1915724. doi:10.1001/jamanetworkopen.2019.15724

**eTable 1.** Other Patient Characteristics

**eTable 2.** Overall Survival Based on Patient Characteristics

**eTable 3.** Comparison of Long-term Survival After Surgery vs SBRT in Operable T1

Patients > 75 Years Old

**eTable 4.** Propensity Score Matched Comparison of Long-term Survival After Sublobar Resection vs SBRT and Characteristics of Matched Patients

**eTable 5.** Propensity Score Matched Comparison of Long-term Survival After Lobar Resection vs SBRT and Characteristics of Matched Patients

**eFigure.** Average Adjusted HR for Mortality Risk After Surgery (Reference) vs SBRT From 16 Patient Population Partitions

This supplementary material has been provided by the authors to give readers additional information about their work.

| <b>eTable 1. Other Patient Characteristics</b> |                          |  |                             |
|------------------------------------------------|--------------------------|--|-----------------------------|
|                                                | <b>SBRT (n = 13,379)</b> |  | <b>Surgery (n = 91,330)</b> |
| <b>Characteristic</b>                          | <b>N (%)</b>             |  | <b>N (%)</b>                |
|                                                |                          |  | <b>P</b>                    |
| <b>Insurance</b>                               |                          |  | < 0.001                     |
| Uninsured                                      | 112 (0.8)                |  | 1,716 (1.9)                 |
| Private                                        | 1,692 (12.7)             |  | 26,886 (29.4)               |
| Medicaid                                       | 521 (3.9)                |  | 4,472 (4.9)                 |
| Medicare                                       | 10,419 (77.9)            |  | 56,305 (61.7)               |
| Other                                          | 635 (4.7)                |  | 1,951 (2.1)                 |
| <b>Income quartile</b>                         |                          |  | < 0.001                     |
| 1                                              | 2,489 (18.6)             |  | 16,712 (18.3)               |
| 2                                              | 3,494 (26.1)             |  | 22,238 (24.4)               |
| 3                                              | 3,787 (28.3)             |  | 24,523 (26.9)               |
| 4 (highest)                                    | 3,542 (26.5)             |  | 27,079 (29.7)               |
| <b>Education quartile</b>                      |                          |  | < 0.001                     |
| 1                                              | 2,027 (15.2)             |  | 14,666 (16.1)               |
| 2                                              | 3,754 (28.1)             |  | 25,187 (27.6)               |
| 3                                              | 4,640 (34.7)             |  | 30,764 (33.7)               |
| 4 (highest)                                    | 2,897 (21.7)             |  | 19,977 (21.9)               |
| <b>Urban vs rural</b>                          |                          |  | < 0.001                     |
| Metropolitan                                   | 10,662 (79.7)            |  | 72,365 (79.2)               |
| Nonmetropolitan                                | 2,425 (18.1)             |  | 16,241 (17.8)               |
| Unknown                                        | 292 (2.2)                |  | 2,724 (3.0)                 |
| <b>Facility location</b>                       |                          |  | < 0.001                     |
| Northeast                                      | 2,626 (19.6)             |  | 19,104 (20.9)               |
| South Atlantic                                 | 2,977 (22.3)             |  | 21,772 (23.8)               |
| Central                                        | 6,215 (46.5)             |  | 39,266 (43.0)               |
| Mountain                                       | 460 (3.4)                |  | 3,081 (3.4)                 |
| Pacific                                        | 1,101 (8.2)              |  | 8,107 (8.9)                 |
| <b>Facility type</b>                           |                          |  | < 0.001                     |
| Academic                                       | 5,493 (41.1)             |  | 30,730 (33.7)               |
| Nonacademic                                    | 7,886 (58.9)             |  | 60,600 (66.4)               |
| <b>Facility volume quartile</b>                |                          |  | < 0.001                     |
| 1                                              | 728 (5.4)                |  | 7,848 (8.6)                 |
| 2                                              | 2,523 (18.9)             |  | 19,718 (21.6)               |
| 3                                              | 5,239 (39.2)             |  | 32,293 (35.4)               |
| 4 (highest)                                    | 4,889 (36.5)             |  | 31,471 (34.5)               |
| <b>Surgery at primary site</b>                 |                          |  |                             |
| Wedge resection                                |                          |  | 13,377 (14.7)               |
| Segmentectomy                                  |                          |  | 3,146 (3.4)                 |
| Lobectomy                                      |                          |  | 72,448 (79.3)               |
| Pneumonectomy                                  |                          |  | 2,359 (2.6)                 |
| <b>Systemic therapy</b>                        |                          |  |                             |

|               |                |  |               |         |
|---------------|----------------|--|---------------|---------|
| Chemotherapy  |                |  |               | < 0.001 |
| No            | 12,990 (97.1)  |  | 74,770 (81.9) |         |
| Yes           | 389 (2.9)      |  | 16,560 (18.1) |         |
| Immunotherapy |                |  |               | 0.20    |
| No            | 13,372 (100.0) |  | 91,245 (99.9) |         |
| Yes           | 7 (0.1)        |  | 85 (0.1)      |         |
| Both          | 6 (0.1)        |  | 59 (0.1)      |         |

SBRT: Stereotactic body radiotherapy.

**eTable 2. Overall Survival Based on Patient Characteristics**

| <b>Characteristics</b>    | <b>N</b> | <b>5-year OS</b> | <b>P</b> |
|---------------------------|----------|------------------|----------|
| <b>Age</b>                |          |                  | < 0.001  |
| ≤ 65                      | 38,083   | 68.9%            |          |
| 66-70                     | 20,508   | 61.5%            |          |
| 71-75                     | 19,745   | 56.1%            |          |
| 76-80                     | 15,337   | 48.5%            |          |
| >80                       | 11,036   | 40.1%            |          |
| <b>Year of diagnosis</b>  |          |                  | < 0.001  |
| 2004-2009                 | 28,704   | 56.3%            |          |
| 2010-2015                 | 76,005   | 60.6%            |          |
| <b>Sex</b>                |          |                  | < 0.001  |
| Male                      | 48,573   | 52.9%            |          |
| Female                    | 56,136   | 64.3%            |          |
| <b>Race</b>               |          |                  | < 0.001  |
| White                     | 92,408   | 58.4%            |          |
| Black                     | 8,603    | 61.9%            |          |
| Other                     | 3,004    | 69.8%            |          |
| Unknown                   | 694      | 63.4%            |          |
| <b>CCS</b>                |          |                  | < 0.001  |
| 0                         | 51,087   | 63.4%            |          |
| 1                         | 36,786   | 58.0%            |          |
| ≥ 2                       | 16,836   | 47.9%            |          |
| <b>Insurance</b>          |          |                  | < 0.001  |
| Uninsured                 | 1,828    | 66.0%            |          |
| Private                   | 28,578   | 70.0%            |          |
| Medicaid                  | 4,993    | 57.5%            |          |
| Medicare                  | 66,724   | 54.1%            |          |
| Other Government          | 1,442    | 53.8%            |          |
| <b>Income quartile</b>    |          |                  | < 0.001  |
| 1 <sup>st</sup>           | 19,201   | 55.7%            |          |
| 2 <sup>nd</sup>           | 25,732   | 56.8%            |          |
| 3 <sup>rd</sup>           | 28,310   | 58.8%            |          |
| 4 <sup>th</sup>           | 30,621   | 64.0%            |          |
| <b>Education quartile</b> |          |                  | < 0.001  |

|                                  |        |       |         |
|----------------------------------|--------|-------|---------|
| 1 <sup>st</sup>                  | 16,693 | 56.9% |         |
| 2 <sup>nd</sup>                  | 28,941 | 57.5% |         |
| 3 <sup>rd</sup>                  | 35,404 | 59.5% |         |
| 4 <sup>th</sup>                  | 22,874 | 62.8% |         |
| <b>Tumor Location</b>            |        |       | < 0.001 |
| RUL                              | 36,079 | 61.1% |         |
| RML                              | 5,031  | 58.7% |         |
| RLL                              | 18,641 | 57.6% |         |
| LUL                              | 27,310 | 58.5% |         |
| LLL                              | 14,719 | 58.6% |         |
| Overlapping                      | 968    | 48.3% |         |
| Lung, NOS                        | 1,461  | 51.6% |         |
| Other                            | 500    | 52.1% |         |
| <b>Clinical T classification</b> |        |       | < 0.001 |
| T1a                              | 6,246  | 72.1% |         |
| T1b                              | 33,353 | 65.6% |         |
| T1c                              | 24,327 | 58.9% |         |
| T2a                              | 22,425 | 54.6% |         |
| T2b                              | 7,701  | 49.6% |         |
| T3                               | 10,370 | 47.7% |         |
| <b>Tumor size (cm)</b>           |        |       | < 0.001 |
| ≤ 3                              | 72,582 | 62.9% |         |
| > 3 – 5                          | 24,612 | 51.2% |         |
| > 5 – 7                          | 7,420  | 47.9% |         |
| <b>Histology</b>                 |        |       | < 0.001 |
| Adenocarcinoma                   | 64,592 | 64.6% |         |
| Squamous cell carcinoma          | 32,502 | 51.3% |         |
| Adenosquamous                    | 2,641  | 48.1% |         |
| Large cell carcinoma             | 1,222  | 50.2% |         |
| Other                            | 3,752  | 44.2% |         |
| <b>Grade</b>                     |        |       | < 0.001 |
| Well diff. NOS                   | 15,327 | 74.7% |         |
| Moderately diff.                 | 44,174 | 60.5% |         |
| Poorly diff./ Undifferentiated   | 33,327 | 53.8% |         |
| <b>Tumor Eextension</b>          |        |       | < 0.001 |
| Confined to one lung             | 58,283 | 61.9% |         |
| Adj. lobe ext.                   | 225    | 55.9% |         |
| MSB/Carina/Hilum                 | 2,320  | 54.3% |         |
| Other central structures         | 494    | 41.0% |         |
| Pleura/chest wall/diaphragm      | 14,350 | 54.6% |         |
| Atelect./ob.pneumonia            | 1,078  | 48.7% |         |

|                                                 |         |       |         |
|-------------------------------------------------|---------|-------|---------|
| <b>Separate tumor nodules, ipsilateral lung</b> |         |       | < 0.001 |
| None                                            | 72,014  | 61.0% |         |
| Yes, same lobe                                  | 2,919   | 55.8% |         |
| Yes, different lobe involved                    | 0       | 0.0%  |         |
| Separate nodules, NOS                           | 0       | 0.0%  |         |
| <b>Scope of LN surgery</b>                      |         |       | < 0.001 |
| No                                              | 20,187  | 39.1% |         |
| Yes                                             | 84,172  | 63.4% |         |
| <b>LN. examined</b>                             |         |       | < 0.001 |
| 0                                               | 19,620  | 39.5% |         |
| 1-5                                             | 25,919  | 61.0% |         |
| 6-10                                            | 25,429  | 64.4% |         |
| 11-15                                           | 14,273  | 65.3% |         |
| 16-20                                           | 6,726   | 65.0% |         |
| 21-25                                           | 2,981   | 64.4% |         |
| 26-90                                           | 3,251   | 63.8% |         |
| Aspiration                                      | 700     | 42.9% |         |
| NOS                                             | 5,628   | 62.5% |         |
| <b>Primary Treatment</b>                        |         |       | < 0.001 |
| SBRT                                            | 13,379  | 30.4% |         |
| Wedge resection                                 | 13,377  | 53.3% |         |
| Segmentectomy                                   | 3,146   | 59.4% |         |
| Lobectomy                                       | 72,448  | 64.6% |         |
| Pneumonectomy                                   | 2,359   | 48.1% |         |
| <b>Systemic therapy</b>                         |         |       |         |
| Chemotherapy                                    |         |       | 0.95    |
| No                                              | 87,760  | 59.2% |         |
| Yes                                             | 16,949  | 57.9% |         |
| Immunotherapy                                   |         |       | 0.14    |
| No                                              | 104,617 | 59.0% |         |
| Yes                                             | 92      | 62.2% |         |
| <b>Urban/Rural</b>                              |         |       | < 0.001 |
| Metropolitan                                    | 83,027  | 60.3% |         |
| Urban                                           | 16,357  | 54.4% |         |
| Rural                                           | 2,309   | 54.0% |         |
| <b>Facility type</b>                            |         |       | < 0.001 |
| Academic                                        | 36,223  | 61.9% |         |
| Nonacademic                                     | 68,486  | 57.5% |         |
| <b>Facility Location</b>                        |         |       | < 0.001 |
| Northeast                                       | 21,730  | 63.0% |         |

|                                   |        |       |         |
|-----------------------------------|--------|-------|---------|
| South Atlantic                    | 24,749 | 59.1% |         |
| Central                           | 45,481 | 56.6% |         |
| Mountain                          | 3,541  | 59.4% |         |
| Pacific                           | 9,208  | 61.4% |         |
| <b>Facility volume quartile</b>   |        |       | < 0.001 |
| 1 <sup>st</sup>                   | 8,417  | 56.8% |         |
| 2 <sup>nd</sup>                   | 23,403 | 57.8% |         |
| 3 <sup>rd</sup>                   | 36,883 | 59.9% |         |
| 4 <sup>th</sup>                   | 36,006 | 59.7% |         |
| <b>Pathological LN positivity</b> |        |       | < 0.001 |
| 0                                 | 73,801 | 65.9% |         |
| 1 – 2                             | 7,528  | 47.9% |         |
| 3 – 6                             | 2,693  | 41.3% |         |
| 7 – 10                            | 419    | 31.8% |         |
| > 10                              | 126    | 20.3% |         |
| # NOS                             | 249    | 42.6% |         |
| None examined                     | 19,620 | 39.5% |         |
| Unknown                           | 266    | 54.4% |         |
| <b>Pathological margin status</b> |        |       | < 0.001 |
| (-)                               | 86,920 | 63.4% |         |
| (X)                               | 227    | 41.8% |         |
| (+), Microscopic                  | 1,991  | 38.0% |         |
| (+), Macroscopic                  | 135    | 31.2% |         |
| (+), NOS                          | 1,281  | 41.2% |         |
| Unknown                           | 776    | 51.5% |         |

OS:  
Overall

survival; CCS: Charlson Comorbidity Score.; RUL: Right upper lobe; RML: Right middle lobe; RLL: Right lower lobe; LUL: Left upper lobe; LLL: Left lower lobe; NOS: Not otherwise specified; diff.: differentiated; Adj.: Adjacent; Ext.: extension; MSB: mainstem bronchus; Atelect.: atelectasis; Ob.: Obstructive; LN: lymph node(s). (-): negative; (+): positive; (X): Indeterminate.

**eTable 3. Comparison of Long-term Survival after Surgery vs SBRT in Operable T1 Patients > 75 Years Old**

| <b>Study Variables</b>                                                                                                            | <b>N</b> | <b>HR*</b> | <b>95% CI</b> | <b>P</b> |
|-----------------------------------------------------------------------------------------------------------------------------------|----------|------------|---------------|----------|
| <b>Treatment</b>                                                                                                                  |          |            |               |          |
| SBRT                                                                                                                              | 89       | Reference  |               |          |
| Sublobar resection                                                                                                                | 1,571    | 1.17       | 0.64 - 2.15   | 0.60     |
| Lobectomy                                                                                                                         | 3,796    | 1.07       | 0.57 - 2.00   | 0.84     |
| Pneumonectomy                                                                                                                     | 29       | 3.20       | 1.20 - 8.49   | 0.02     |
| <b>Histology</b>                                                                                                                  |          |            |               |          |
| Adenocarcinoma                                                                                                                    | 3,858    | Reference  |               |          |
| Squamous cell carcinoma                                                                                                           | 1,313    | 1.31       | 1.08 - 1.57   | 0.005    |
| Other                                                                                                                             | 314      | 1.84       | 1.31 - 2.60   | 0.001    |
| <b>Tumor extension</b>                                                                                                            |          |            |               |          |
| Confined to the lung                                                                                                              | 3,541    | Reference  |               |          |
| Others                                                                                                                            | 566      | 1.30       | 1.07 - 1.59   | 0.009    |
| <b>Separate tumor nodules</b>                                                                                                     |          |            |               |          |
| No                                                                                                                                | 3,638    | Reference  |               |          |
| Yes                                                                                                                               | 139      | 1.88       | 1.30 - 2.71   | 0.001    |
| *Also adjusted for the number of lymph nodes examined. HR: Hazard Ratio for mortality risk; SBRT: Stereotactic body radiotherapy. |          |            |               |          |



**eTable 4. Propensity Score Matched Comparison of Long-term Survival after Sublobar Resection vs SBRT and Characteristics of Matched Patients**

| <b>Survival Comparison</b>                         | <b>HR (95% CI)</b>                         | <b>P</b>                     |
|----------------------------------------------------|--------------------------------------------|------------------------------|
| Sublobar Resection (n =12,632) vs SBRT (n =12,632) | 0.56 (0.54, 0.58)                          | <0.001                       |
| <b>Based on #LN Examined During Surgery</b>        |                                            |                              |
| Sublobar Resection (0) vs SBRT                     | 0.68 (0.64, 0.71)                          | <0.001                       |
| Sublobar Resection (1 - 10) vs SBRT                | 0.51 (0.49, 0.54)                          | <0.001                       |
| Sublobar Resection (11 - 15) vs SBRT               | 0.42 (0.36, 0.48)                          | <0.001                       |
| Sublobar Resection (> 15) vs SBRT                  | 0.33 (0.27, 0.41)                          | <0.001                       |
| <b>Characteristics of Matched Patients</b>         | <b>Sublobar Resection<br/>(n = 12,632)</b> | <b>SBRT<br/>(n = 12,632)</b> |
|                                                    | <b>N (%)</b>                               | <b>N (%)</b>                 |
| <b>Age</b>                                         |                                            |                              |
| ≤ 75                                               | 8,303 (66)                                 | 6,526 (52)                   |
| >75                                                | 4,329 (34)                                 | 6,106 (48)                   |
| <b>Sex</b>                                         |                                            |                              |
| Male                                               | 5,512 (44)                                 | 5,691 (45)                   |
| Female                                             | 7,120 (56)                                 | 6,941 (55)                   |
| <b>Tumor grade</b>                                 |                                            |                              |
| 1                                                  | 2,157 (17)                                 | 1,021 (8)                    |
| 2                                                  | 5,314 (42)                                 | 2,316 (18)                   |
| 3 or 4                                             | 4,145 (33)                                 | 2,675 (21)                   |
| Unknown                                            | 1,016 (8)                                  | 6,620 (52)                   |
| <b>Clinical T stage</b>                            |                                            |                              |
| T1                                                 | 9,370 (74)                                 | 8,980 (71)                   |
| T2                                                 | 2,643 (21)                                 | 3,050 (24)                   |
| T3                                                 | 619 (5)                                    | 602 (5)                      |
| <b>Race</b>                                        |                                            |                              |
| White                                              | 11,303 (89)                                | 11,239 (89)                  |
| Black                                              | 981 (8)                                    | 1,097 (9)                    |

|                                   |            |            |
|-----------------------------------|------------|------------|
| Others                            | 256 (2)    | 206 (2)    |
| Unknown                           | 92 (1)     | 90 (1)     |
| <b>Charlson Comorbidity Score</b> |            |            |
| 0                                 | 5,784 (46) | 6,609 (52) |
| 1                                 | 4,302 (34) | 3,598 (28) |
| 2 or 3                            | 2,546 (20) | 2,425 (19) |
| <b>Histology</b>                  |            |            |
| Adenocarcinoma                    | 7,656 (61) | 6,176 (49) |
| Squamous cell carcinoma           | 4,230 (33) | 4,815 (38) |
| Adenosquamous                     | 181 (1)    | 127 (1)    |
| Large cell carcinoma              | 128 (1)    | 75 (1)     |
| Other                             | 437 (3)    | 1,439 (11) |

HR: Hazard Ratio for mortality risk; CI: Confidence Interval; SBRT: Stereotactic body radiotherapy.

**eTable 5. Propensity Score Matched Comparison of Long-term Survival after Lobar Resection vs SBRT and Characteristics of Matched Patients**

| <b>Survival Comparison</b>                        | <b>HR (95% CI)</b>                      | <b>P</b>                     |
|---------------------------------------------------|-----------------------------------------|------------------------------|
| Lobar Resection (n = 12,632) vs SBRT (n = 12,632) | 0.47 (0.45, 0.49)                       | < 0.001                      |
| <b>Based on #LN Examined During Surgery</b>       |                                         |                              |
| Lobar Resection (0) vs SBRT                       | 0.54 (0.47, 0.62)                       | < 0.001                      |
| Lobar Resection (1 - 10) vs SBRT                  | 0.46 (0.44, 0.48)                       | < 0.001                      |
| Lobar Resection (11 - 15) vs SBRT                 | 0.46 (0.42, 0.49)                       | < 0.001                      |
| Lobar Resection (> 15) vs SBRT                    | 0.46 (0.43, 0.51)                       | < 0.001                      |
| <b>Characteristics of Matched Patients</b>        | <b>Lobar Resection<br/>(n = 12,632)</b> | <b>SBRT<br/>(n = 12,632)</b> |
|                                                   | <b>N (%)</b>                            | <b>N (%)</b>                 |
| <b>Age</b>                                        |                                         |                              |
| ≤ 75                                              | 5,929 (47)                              | 6,526 (52)                   |
| >75                                               | 6,703 (53)                              | 6,106 (48)                   |
| <b>Sex</b>                                        |                                         |                              |
| Male                                              | 5,722 (45)                              | 5,691 (45)                   |
| Female                                            | 6,910 (55)                              | 6,941 (55)                   |
| <b>Tumor grade</b>                                |                                         |                              |
| 1                                                 | 1,863 (15)                              | 1,021 (8)                    |
| 2                                                 | 3,220 (25)                              | 2,316 (18)                   |
| 3 or 4                                            | 4,236 (34)                              | 2,675 (21)                   |
| Unknown                                           | 3,313 (26)                              | 6,620 (52)                   |
| <b>Clinical T stage</b>                           |                                         |                              |
| T1                                                | 8,652 (68)                              | 8,980 (71)                   |
| T2                                                | 3,262 (26)                              | 3,050 (24)                   |
| T3                                                | 718 (6)                                 | 602 (5)                      |
| <b>Race</b>                                       |                                         |                              |

|                                   |             |             |
|-----------------------------------|-------------|-------------|
| White                             | 11,309 (90) | 11,239 (89) |
| Black                             | 1,026 (8)   | 1,097 (9)   |
| Others                            | 210 (2)     | 206 (2)     |
| Unknown                           | 87 (1)      | 90 (1)      |
| <b>Charlson Comorbidity Score</b> |             |             |
| 0                                 | 6,462 (51)  | 6,609 (52)  |
| 1                                 | 3,847 (30)  | 3,598 (28)  |
| 2 or 3                            | 2,323 (18)  | 2,425 (19)  |
| <b>Histology</b>                  |             |             |
| Adenocarcinoma                    | 6,410 (51)  | 6,176 (49)  |
| Squamous cell carcinoma           | 5,036 (40)  | 4,815 (38)  |
| Adenosquamous                     | 167 (1)     | 127 (1)     |
| Large cell carcinoma              | 85 (1)      | 75 (1)      |
| Other                             | 934 (7)     | 1,439 (11)  |

HR: Hazard Ratio; CI: Confidence Interval; SBRT: Stereotactic body radiotherapy.

**eFigure. Average Adjusted HR for Mortality Risk after Surgery (Reference) vs SBRT from 16 Patient Population Partitions**

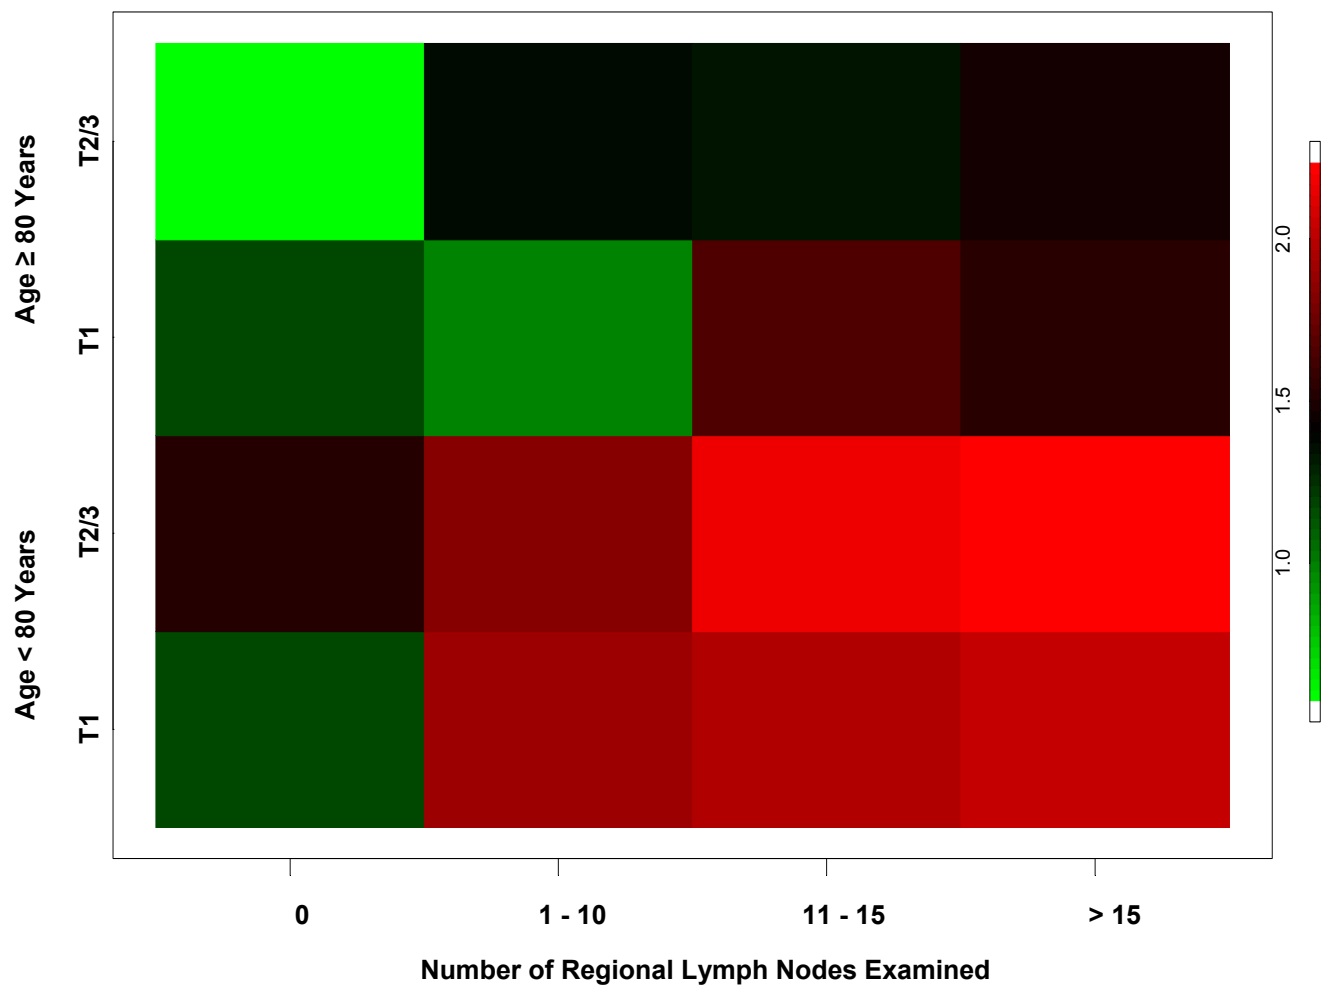

Supplement: jamanetwopen-2-e1915724-s001.pdf [file jamanetwopen-2-e1915724-s001.pdf]
